# Supplementary material for: Artificial metallopeptidases: regioselective cleavage of lysozyme
Source: Royal Society of Chemistry journal article supplement (doi:10.1039/a907477e), 2000-01-01
Supplement: a907477e.doc [file a907477e.doc]

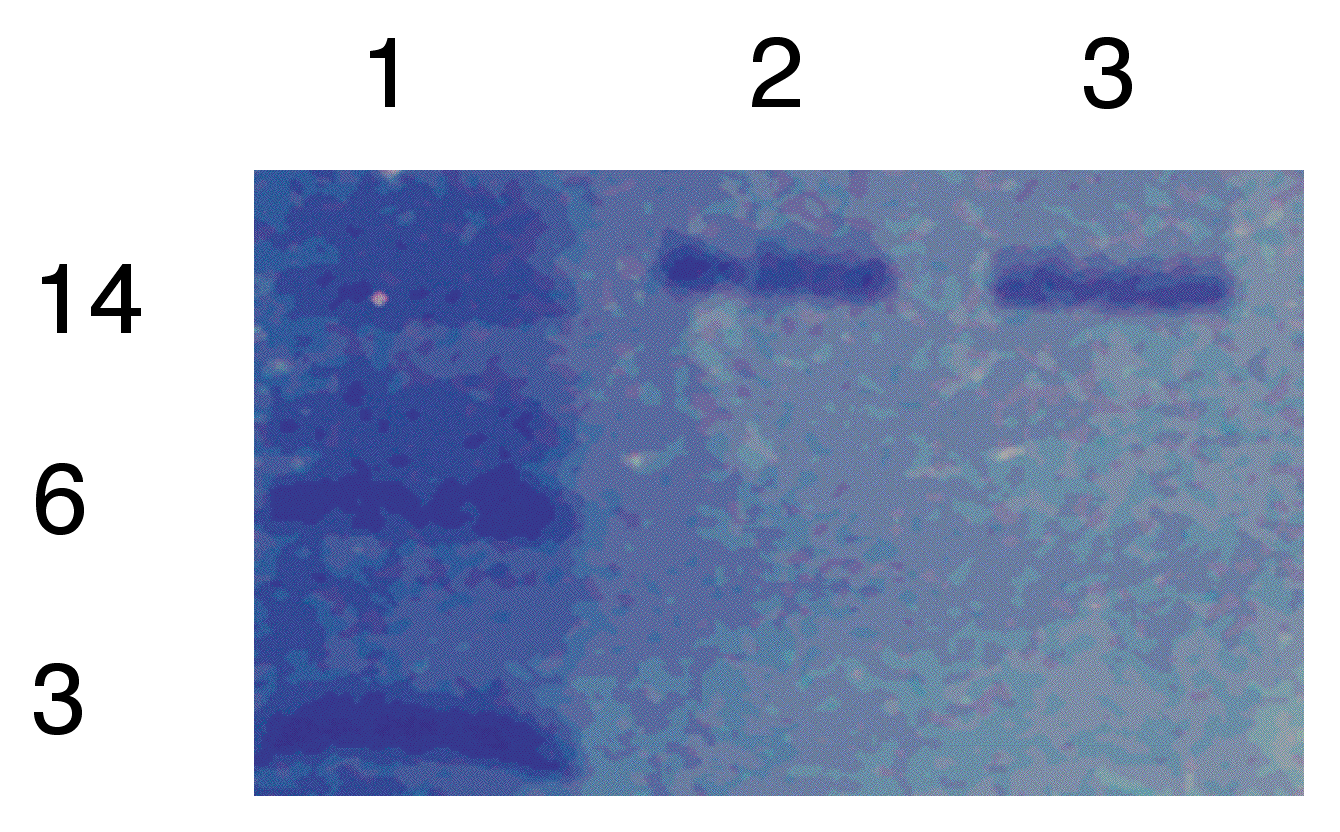
Lane 1 contains the molecular weight markers 14, 6 and 3 kDa, from top to bottom, respectively. Lane 2 contains lysozyme(0.015 mM) incubated at room temperature and lane 3 contains lysozyme(0.015 mM heated to 37 degrees C for 26 h. No products are visible in lanes 2 or 3
